# Supplementary material for: Unique physiological and pathogenic features of Leptospira interrogans revealed by whole-genome sequencing
Source: Springer Nature journal article supplement (doi:10.1038/nature01597), 2003-04-01
Supplement: nature01597-s1.pdf [file nature01597-s1.pdf]

**Supplementary information 1: Schematic illustration of the putative replication origins of (a) CI and (b) CII of *L. interrogans* strain Lai.**

Chromosomal regions of the putative replication origins for each chromosome flanked by pairs of *parAB* are drawn to their nucleotide scale as indicated. The sequences of putative DnaA boxes are also presented.

(a) Chromosome I (CI: LA4331-LA1928)

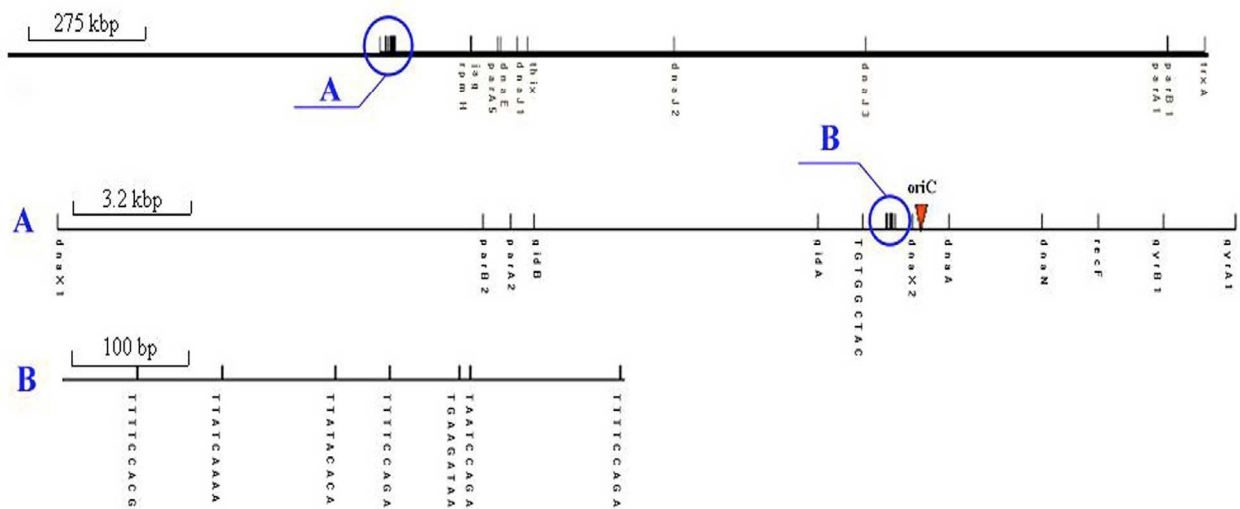

(b) Chromosome II (CII: LB365-LB027)

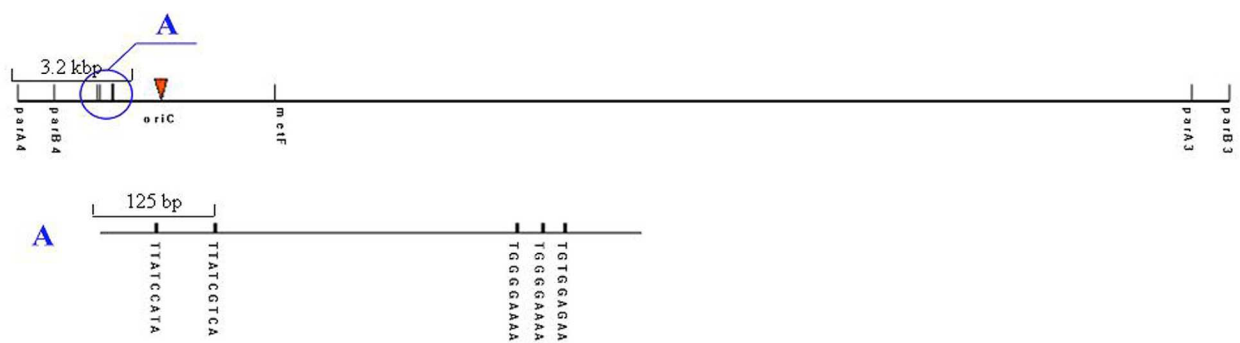

Genes related to the replication origins of CI and CII are listed below:

| <b>ID</b> | <b>Strand</b> | <b>Product</b>                                | <b>Genes</b> |
|-----------|---------------|-----------------------------------------------|--------------|
| LA4331    | F             | DNA polymerase III subunit gamma              | <i>dnaX1</i> |
| LA4346    | R             | ParB-like nuclease domain                     | <i>parB2</i> |
| LA4347    | R             | ParA protein                                  | <i>parA2</i> |
| LA4348    | R             | Glucose inhibited division protein B          | <i>gidB</i>  |
| LA4359    | R             | glucose inhibited division protein A          | <i>gidA</i>  |
| LA4361    | F             | DNA polymerase III subunits gamma and tau     | <i>dnaX2</i> |
| LA0001    | F             | chromosomal replication initiator protein     | <i>dnaA</i>  |
| LA0002    | F             | DNA polymerase III subunit beta               | <i>dnaN</i>  |
| LA0003    | F             |                                               | <i>recF</i>  |
| LA0005    | F             | DNA gyrase subunit B                          | <i>gyrB1</i> |
| LA0006    | F             | DNA gyrase subunit A                          | <i>gyrA1</i> |
| LA0175    | F             | ribosomal protein L34                         | <i>rpmH</i>  |
| LA0179    | F             | Jag protein homolog                           | <i>jag</i>   |
| LA0255    | R             | ParA family protein                           | <i>parA5</i> |
| LA0258    | F             | DNA polymerase III subunit alpha              | <i>dnaE</i>  |
| LA0298    | R             | heat shock protein DnaJ homolog               | <i>dnaJ1</i> |
| LA0320    | F             | Thiol-disulfide isomerase and thioredoxins    | <i>thiX</i>  |
| LA0655    | F             | Molecular chaperone DnaJ                      | <i>dnaJ2</i> |
| LA1104    | R             | Molecular chaperone DnaJ                      | <i>dnaJ3</i> |
| LA1837    | F             | ParA family protein                           | <i>parA1</i> |
| LA1838    | F             | Probable chromosome partitioning protein ParB | <i>parB1</i> |
| LA1928    | F             | Thioredoxin (TRX)                             | <i>trxA</i>  |
| LB365     | F             | ParA protein                                  | <i>parA4</i> |
| LB366     | F             | ParB family protein                           | <i>parB4</i> |
| LB002     | F             | methylenetetrahydrofolate reductase           | <i>metF</i>  |
| LB026     | F             | ParA protein                                  | <i>parA3</i> |
| LB027     | F             | ParB protein                                  | <i>parB3</i> |
