# Supplementary material for: Unique physiological and pathogenic features of Leptospira interrogans revealed by whole-genome sequencing
Source: Springer Nature journal article supplement (doi:10.1038/nature01597), 2003-04-01
Supplement: nature01597-s7.pdf [file nature01597-s7.pdf]

**Supplementary information 7: Hemolysin genes of *L. interrogans* serovar lai.**

**A. Sphingomyelinase-like hemolysins from *L. interrogans* serovar lai**

Relevant genes: *sph1-4*: LA1027, LA1029, LA4004, LA3050; *sphH\**, LA3540

**1. Domain analysis of predicted sphingomyelinase-like hemolysins from *L. interrogans* serovar lai**

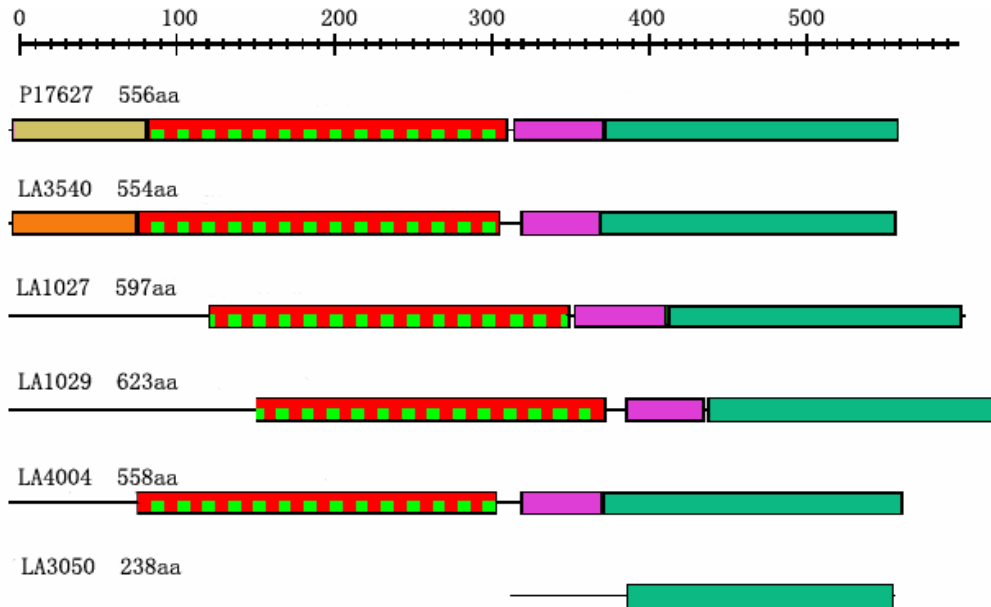

**Conserved structure domains illustrated in the figure:**

| ProDom ID | Illustration | Domain                             |
|-----------|--------------|------------------------------------|
| PD133144  |              | sphingomyelinase C precursor SMASE |
| PD133145  |              | hemolytic                          |
| PD011673  |              | precursor hydrolase signal         |
| PD447657  |              | precursor hydrolase signal         |
| PD041204  |              | sphingomyelinase C precursor SMASE |

Domain homology comparison (% of identities, similarities) for the predicted sphingomyelinase-like hemolysins from *L. interrogans* strain Lai and SP/P17627 (*L. interrogans* serovar hardijo)

| ID     | PD133144 | PD 133145 | PD011673 | PD447657 | PD041204 |
|--------|----------|-----------|----------|----------|----------|
| P17627 | 100,100  | —         | 100,100  | 100,100  | 100,100  |
| LA3540 | —        | 100,100   | 100,100  | 100,100  | 90,90    |
| LA1027 | —        | —         | 61, 76   | 71, 78   | 60, 74   |
| LA1029 | —        | —         | 68, 83   | 82, 89   | 57, 70   |
| LA4004 | —        | —         | 56, 72   | 74, 82   | 54, 68   |
| LA3050 | —        | —         | —        | —        | 53, 67   |

2. Sequence similarity comparison of predicted sphingomyelinase-like hemolysins from *L. interrogans* serovar lai with that from *L. interrogans* serovar hardijo (sp|P17627):

|        |     |                                                                                                                                                                                                                                                                                                                                                                                                                                                      |     |
|--------|-----|------------------------------------------------------------------------------------------------------------------------------------------------------------------------------------------------------------------------------------------------------------------------------------------------------------------------------------------------------------------------------------------------------------------------------------------------------|-----|
| P17627 | 1   | -----MRIKK <sup>Y</sup> TKVRL <sup>L</sup> VN <sup>C</sup> CL <sup>L</sup> LF <sup>F</sup> LD <sup>C</sup> GAD <sup>R</sup> QSLYKD <sup>L</sup> AS <sup>L</sup> IYISDNK                                                                                                                                                                                                                                                                              | 47  |
| LA1027 | 1   | MITKRNIPPC <sup>K</sup> KNW <sup>K</sup> YK <sup>K</sup> KSISLT <sup>L</sup> ITICYMFL <sup>L</sup> FLTS <sup>C</sup> KPG <sup>K</sup> KNSIN <sup>L</sup> LL <sup>L</sup> LLNTLDNK                                                                                                                                                                                                                                                                    | 59  |
| LA1029 | 1   | -----MINK <sup>I</sup> TKPKL <sup>L</sup> I <sup>G</sup> YLL <sup>L</sup> FLSL <sup>L</sup> IR <sup>C</sup> LPE <sup>K</sup> ESSYKD <sup>L</sup> FTS <sup>L</sup> LLFLPNQT                                                                                                                                                                                                                                                                           | 46  |
| LA4004 | 1   | MKTKRNPLLNK <sup>C</sup> KPK <sup>K</sup> FKYRNL <sup>L</sup> I <sup>G</sup> LL <sup>L</sup> CL <sup>F</sup> PLN <sup>C</sup> TFK <sup>D</sup> SLVYN <sup>K</sup> F <sup>L</sup> MY <sup>L</sup> ISFSHKNL                                                                                                                                                                                                                                            | 58  |
| LA3540 | 1   | ---MRN <sup>I</sup> FRK <sup>K</sup> KN <sup>G</sup> IRN <sup>T</sup> YK <sup>K</sup> SK <sup>S</sup> L <sup>I</sup> GFY <sup>C</sup> LF <sup>M</sup> FF <sup>L</sup> LN <sup>C</sup> LP <sup>D</sup> KQ <sup>K</sup> EHAD <sup>L</sup> MS <sup>L</sup> LLFSKDQ                                                                                                                                                                                      | 57  |
| LA3050 | 1   | -----                                                                                                                                                                                                                                                                                                                                                                                                                                                | 1   |
| P17627 | 48  | <sup>N</sup> IG <sup>L</sup> -----ST <sup>N</sup> SD <sup>L</sup> LTGSGSV                                                                                                                                                                                                                                                                                                                                                                            | 62  |
| LA1027 | 60  | NVNEK <sup>I</sup> EDSTNTDP-----SS <sup>N</sup> VNEEDENSI                                                                                                                                                                                                                                                                                                                                                                                            | 85  |
| LA1029 | 47  | <sup>N</sup> SNQVNSVSINNDPANPNPVPNPASANNQVNAVPE <sup>N</sup> DDPANLNPVNPASAN <sup>S</sup> NQVNAAPE                                                                                                                                                                                                                                                                                                                                                   | 106 |
| LA4004 | 59  | <sup>N</sup> FE-----LEN <sup>I</sup> NS <sup>T</sup> RK---                                                                                                                                                                                                                                                                                                                                                                                           | 70  |
| LA3540 | 58  | <sup>N</sup> IQ-----FAN <sup>I</sup> SAERIG--                                                                                                                                                                                                                                                                                                                                                                                                        | 70  |
| LA3050 | 1   | -----                                                                                                                                                                                                                                                                                                                                                                                                                                                | 1   |
| P17627 | 63  | SSSPA <sup>D</sup> AAP <sup>E</sup> -----NSILAN-----SIP-----ENMG <sup>T</sup> K <sup>I</sup> L <sup>T</sup> H <sup>N</sup> V <sup>F</sup> LLP                                                                                                                                                                                                                                                                                                        | 97  |
| LA1027 | 86  | NANAND <sup>N</sup> AP <sup>S</sup> SDSDSSNPRSPDKNPVN-----PTSPNS-SSADIG <sup>I</sup> K <sup>I</sup> L <sup>S</sup> HS <sup>I</sup> FMAP                                                                                                                                                                                                                                                                                                              | 135 |
| LA1029 | 107 | NGSPA <sup>D</sup> PN <sup>P</sup> ANLASANNQVNAVANNYFTKEDSSNIPK <sup>K</sup> VNSKNVE <sup>L</sup> K <sup>V</sup> LS <sup>H</sup> N <sup>V</sup> FMLP                                                                                                                                                                                                                                                                                                 | 166 |
| LA4004 | 70  | -----TLL <sup>P</sup> K-----SEIDL <sup>N</sup> LS <sup>Y</sup> N <sup>L</sup> FLYS                                                                                                                                                                                                                                                                                                                                                                   | 91  |
| LA3540 | 70  | -----I <sup>D</sup> AQVS-----SEVD <sup>T</sup> K <sup>I</sup> LS <sup>Y</sup> N <sup>L</sup> FM <sup>Y</sup> H                                                                                                                                                                                                                                                                                                                                       | 92  |
| LA3050 | 1   | -----                                                                                                                                                                                                                                                                                                                                                                                                                                                | 1   |
| P17627 | 98  | KT <sup>L</sup> PG <sup>W</sup> GN <sup>W</sup> GQ <sup>N</sup> ERA <sup>R</sup> Q <sup>R</sup> IV <sup>S</sup> SN <sup>Y</sup> I <sup>Q</sup> NQ <sup>D</sup> V <sup>I</sup> V <sup>F</sup> DEA <sup>F</sup> DT <sup>D</sup> ARK <sup>I</sup> LLD <sup>G</sup> V <sup>R</sup> SE <sup>Y</sup> YP <sup>Q</sup> TD <sup>V</sup> I <sup>G</sup>                                                                                                        | 157 |
| LA1027 | 136 | TN <sup>L</sup> SS <sup>W</sup> GD <sup>L</sup> GQ <sup>E</sup> ERA <sup>R</sup> Q <sup>R</sup> IAS <sup>S</sup> SY <sup>I</sup> KNQ <sup>D</sup> V <sup>I</sup> V <sup>F</sup> EGL <sup>S</sup> H <sup>N</sup> NA <sup>E</sup> K <sup>I</sup> LL <sup>E</sup> K <sup>I</sup> RS <sup>E</sup> YP <sup>Q</sup> TN <sup>V</sup> VG                                                                                                                     | 195 |
| LA1029 | 167 | TN <sup>L</sup> PR <sup>W</sup> GN <sup>L</sup> GH <sup>D</sup> ERA <sup>R</sup> K <sup>I</sup> SK <sup>S</sup> D <sup>Y</sup> V <sup>K</sup> NQ <sup>D</sup> V <sup>I</sup> V <sup>F</sup> EAA <sup>F</sup> DT <sup>S</sup> ARK <sup>I</sup> LLD <sup>N</sup> LRE <sup>E</sup> YP <sup>Q</sup> TD <sup>V</sup> I <sup>G</sup>                                                                                                                       | 226 |
| LA4004 | 92  | KED <sup>I</sup> YF <sup>G</sup> Y <sup>W</sup> E <sup>E</sup> K <sup>R</sup> A <sup>L</sup> LL <sup>G</sup> K <sup>S</sup> K <sup>F</sup> T <sup>K</sup> NQ <sup>D</sup> V <sup>I</sup> V <sup>L</sup> SRV <sup>F</sup> DT <sup>N</sup> AR <sup>N</sup> T <sup>L</sup> LD <sup>N</sup> L <sup>N</sup> L <sup>E</sup> Y <sup>P</sup> D <sup>Q</sup> TD <sup>V</sup> I <sup>G</sup>                                                                   | 151 |
| LA3540 | 93  | KG <sup>L</sup> FN <sup>S</sup> GN <sup>W</sup> GQ <sup>E</sup> K <sup>R</sup> A <sup>R</sup> LL <sup>V</sup> D <sup>S</sup> K <sup>Y</sup> V <sup>K</sup> D <sup>Q</sup> D <sup>V</sup> V <sup>L</sup> LEGV <sup>F</sup> DT <sup>S</sup> K <sup>S</sup> KN <sup>L</sup> LM <sup>N</sup> GL <sup>R</sup> S <sup>Y</sup> PN <sup>Q</sup> TD <sup>V</sup> I <sup>G</sup>                                                                               | 152 |
| LA3050 | 1   | -----MK <sup>M</sup> I <sup>Q</sup> N <sup>I</sup> LR <sup>K</sup> E-                                                                                                                                                                                                                                                                                                                                                                                | 11  |
| P17627 | 158 | RT <sup>K</sup> K <sup>G</sup> W <sup>D</sup> A <sup>T</sup> L <sup>G</sup> L <sup>Y</sup> RT---DAFT <sup>N</sup> GGV <sup>I</sup> V <sup>S</sup> K <sup>W</sup> P <sup>I</sup> E <sup>E</sup> K <sup>I</sup> Q <sup>H</sup> V <sup>F</sup> K <sup>E</sup> K <sup>G</sup> CG <sup>A</sup> D <sup>V</sup> FS <sup>N</sup> K <sup>G</sup> F <sup>A</sup> YV                                                                                            | 214 |
| LA1027 | 196 | RT <sup>K</sup> K <sup>G</sup> W <sup>N</sup> A <sup>T</sup> L <sup>G</sup> A <sup>Y</sup> IT---SPM <sup>A</sup> GGV <sup>I</sup> V <sup>S</sup> K <sup>W</sup> P <sup>I</sup> E <sup>E</sup> K <sup>V</sup> Q <sup>Y</sup> I <sup>F</sup> N <sup>N</sup> S <sup>N</sup> CG <sup>Q</sup> D <sup>Q</sup> Y <sup>Y</sup> N <sup>K</sup> G <sup>F</sup> A <sup>Y</sup> V                                                                                | 252 |
| LA1029 | 227 | RT <sup>K</sup> K <sup>N</sup> W <sup>D</sup> A <sup>S</sup> L <sup>G</sup> N <sup>F</sup> RS---YSLV <sup>N</sup> GGV <sup>I</sup> V <sup>S</sup> K <sup>W</sup> P <sup>I</sup> E <sup>E</sup> K <sup>I</sup> Q <sup>Y</sup> I <sup>F</sup> N <sup>D</sup> S <sup>G</sup> CG <sup>A</sup> D <sup>W</sup> F <sup>A</sup> N <sup>K</sup> G <sup>F</sup> V <sup>Y</sup> V                                                                               | 283 |
| LA4004 | 152 | K <sup>T</sup> K <sup>Y</sup> G <sup>W</sup> D <sup>Q</sup> T <sup>L</sup> G <sup>D</sup> FR---QQIN <sup>N</sup> GGV <sup>I</sup> V <sup>S</sup> K <sup>W</sup> P <sup>I</sup> E <sup>E</sup> K <sup>I</sup> Q <sup>Y</sup> I <sup>F</sup> K <sup>N</sup> H <sup>G</sup> CG <sup>N</sup> D <sup>F</sup> Y <sup>Y</sup> N <sup>K</sup> G <sup>F</sup> A <sup>Y</sup> V                                                                                | 207 |
| LA3540 | 153 | R <sup>A</sup> T <sup>Y</sup> G <sup>W</sup> N <sup>Q</sup> T <sup>L</sup> G <sup>D</sup> FR <sup>A</sup> F <sup>L</sup> LD <sup>N</sup> D <sup>Y</sup> GGV <sup>I</sup> V <sup>L</sup> S <sup>K</sup> W <sup>P</sup> I <sup>E</sup> E <sup>K</sup> I <sup>Q</sup> Y <sup>I</sup> F <sup>E</sup> N <sup>H</sup> G <sup>G</sup> N <sup>D</sup> Y <sup>Y</sup> N <sup>K</sup> G <sup>F</sup> V <sup>Y</sup> V                                          | 212 |
| LA3050 | 12  | K <sup>V</sup> K <sup>T</sup> W <sup>N</sup> QL <sup>K</sup> G-----SK <sup>F</sup> FR <sup>C</sup> CL <sup>F</sup> I-----I <sup>L</sup> F <sup>F</sup> D---CL <sup>P</sup> D-----                                                                                                                                                                                                                                                                    | 42  |
| P17627 | 215 | R <sup>I</sup> D <sup>K</sup> N <sup>G</sup> R <sup>K</sup> F <sup>H</sup> I <sup>G</sup> T <sup>H</sup> V <sup>Q</sup> A <sup>D</sup> S <sup>G</sup> CAN <sup>L</sup> G <sup>V</sup> VS <sup>R</sup> V <sup>N</sup> Q <sup>F</sup> NE <sup>T</sup> RD <sup>F</sup> IDS <sup>K</sup> K <sup>I</sup> P <sup>K</sup> NE <sup>M</sup> V <sup>L</sup> IAG <sup>D</sup> LN                                                                                | 274 |
| LA1027 | 253 | K <sup>I</sup> N <sup>K</sup> D <sup>G</sup> K <sup>K</sup> F <sup>H</sup> V <sup>I</sup> GT <sup>Q</sup> LQ <sup>A</sup> RE <sup>P</sup> DC <sup>F</sup> NS <sup>G</sup> ET <sup>I</sup> R <sup>K</sup> L <sup>Q</sup> L <sup>N</sup> D <sup>I</sup> KS <sup>F</sup> IDS <sup>K</sup> D <sup>I</sup> P <sup>K</sup> DE <sup>T</sup> V <sup>L</sup> I <sup>T</sup> G <sup>D</sup> LN                                                                 | 312 |
| LA1029 | 284 | K <sup>I</sup> N <sup>K</sup> E <sup>G</sup> K <sup>K</sup> F <sup>H</sup> V <sup>I</sup> GT <sup>H</sup> A <sup>Q</sup> S <sup>D</sup> Q <sup>N</sup> C <sup>S</sup> N <sup>L</sup> G <sup>I</sup> PN <sup>R</sup> AN <sup>Q</sup> F <sup>D</sup> IR <sup>N</sup> F <sup>I</sup> Y <sup>S</sup> KN <sup>I</sup> P <sup>K</sup> DE <sup>T</sup> V <sup>L</sup> I <sup>V</sup> G <sup>D</sup> LN                                                      | 343 |
| LA4004 | 208 | K <sup>I</sup> K <sup>G</sup> S <sup>Q</sup> I <sup>H</sup> I <sup>H</sup> V <sup>G</sup> T <sup>D</sup> Q <sup>S</sup> ED <sup>S</sup> T <sup>C</sup> S <sup>D</sup> L <sup>G</sup> YN <sup>A</sup> R <sup>I</sup> N <sup>Q</sup> L <sup>T</sup> E <sup>K</sup> KE <sup>I</sup> DS <sup>K</sup> R <sup>I</sup> SN <sup>K</sup> E <sup>V</sup> L <sup>I</sup> AG <sup>A</sup> LN                                                                     | 267 |
| LA3540 | 213 | K <sup>I</sup> N <sup>K</sup> H <sup>G</sup> R <sup>K</sup> Y <sup>H</sup> I <sup>G</sup> T <sup>D</sup> V <sup>Q</sup> N--T <sup>S</sup> C <sup>S</sup> D <sup>L</sup> G <sup>Q</sup> N <sup>A</sup> R <sup>K</sup> H <sup>Q</sup> F <sup>V</sup> E <sup>I</sup> KN <sup>F</sup> IN <sup>L</sup> K <sup>Q</sup> V <sup>P</sup> KN <sup>E</sup> T <sup>I</sup> FL <sup>A</sup> GS <sup>F</sup> N                                                     | 270 |
| LA3050 | 42  | -----L <sup>Q</sup> S-----S <sup>E</sup> NN <sup>L</sup> FL <sup>S</sup> LL <sup>S</sup> L <sup>P</sup> K <sup>N</sup> GG <sup>I</sup> L <sup>I</sup> LR <sup>N</sup> D <sup>K</sup> S                                                                                                                                                                                                                                                               | 70  |
| P17627 | 275 | V <sup>I</sup> I <sup>K</sup> GS-REY <sup>H</sup> Q <sup>M</sup> L <sup>C</sup> I <sup>N</sup> V <sup>N</sup> N <sup>P</sup> K <sup>Y</sup> V <sup>G</sup> V <sup>P</sup> FT <sup>W</sup> D <sup>T</sup> K <sup>T</sup> NE <sup>I</sup> AA <sup>F</sup> Y <sup>Y</sup> K---K <sup>V</sup> EP <sup>A</sup> Y <sup>L</sup> D <sup>Y</sup> I <sup>F</sup> VS                                                                                            | 329 |
| LA1027 | 313 | I <sup>I</sup> I <sup>K</sup> GSNEY <sup>F</sup> D <sup>M</sup> ISK <sup>L</sup> N <sup>V</sup> NE <sup>P</sup> RY <sup>V</sup> G <sup>V</sup> P <sup>F</sup> T <sup>L</sup> D <sup>T</sup> K <sup>T</sup> NA <sup>L</sup> AA <sup>Y</sup> Y <sup>E</sup> ---KE <sup>K</sup> P <sup>I</sup> Y <sup>L</sup> D <sup>Y</sup> I <sup>L</sup> VS                                                                                                          | 367 |
| LA1029 | 344 | V <sup>I</sup> I <sup>K</sup> ESNEY <sup>Y</sup> D <sup>M</sup> ISR <sup>L</sup> N <sup>V</sup> NE <sup>P</sup> RY <sup>V</sup> G <sup>V</sup> P <sup>F</sup> T <sup>W</sup> DA <sup>K</sup> T <sup>N</sup> E <sup>I</sup> AA <sup>Y</sup> Y <sup>E</sup> ---NE <sup>E</sup> P <sup>V</sup> Y <sup>L</sup> D <sup>Y</sup> I <sup>F</sup> VS                                                                                                          | 398 |
| LA4004 | 268 | V <sup>D</sup> KS <sup>N</sup> Q <sup>S</sup> EY <sup>K</sup> N <sup>M</sup> L <sup>N</sup> I <sup>L</sup> EV <sup>N</sup> EP <sup>N</sup> Y <sup>A</sup> G <sup>I</sup> P <sup>F</sup> T <sup>W</sup> D <sup>T</sup> K <sup>K</sup> NA <sup>A</sup> Y <sup>N</sup> I <sup>Y</sup> SW <sup>N</sup> Q <sup>T</sup> S <sup>N</sup> Y <sup>G</sup> E <sup>I</sup> Y <sup>L</sup> VS                                                                     | 327 |
| LA3540 | 271 | V <sup>N</sup> K <sup>G</sup> S-TEY <sup>Q</sup> D <sup>I</sup> L <sup>M</sup> I <sup>L</sup> G <sup>V</sup> D <sup>E</sup> PH <sup>Y</sup> A <sup>G</sup> I <sup>S</sup> FT <sup>W</sup> D <sup>P</sup> K <sup>K</sup> NA <sup>I</sup> AS <sup>Y</sup> T---S <sup>G</sup> T <sup>N</sup> Q <sup>V</sup> SS <sup>Y</sup> L <sup>E</sup> Y <sup>I</sup> F <sup>V</sup> V                                                                              | 326 |
| LA3050 | 71  | I <sup>A</sup> K <sup>S</sup> -----K-----                                                                                                                                                                                                                                                                                                                                                                                                            | 75  |
| P17627 | 330 | K <sup>S</sup> H <sup>F</sup> Q <sup>P</sup> P <sup>I</sup> W <sup>Q</sup> N <sup>L</sup> A <sup>Y</sup> D <sup>P</sup> I <sup>S</sup> AK <sup>T</sup> W <sup>T</sup> A <sup>K</sup> -G <sup>Y</sup> T <sup>S</sup> D <sup>E</sup> F <sup>S</sup> D <sup>H</sup> Y <sup>P</sup> Y <sup>G</sup> F <sup>I</sup> Y <sup>A</sup> D <sup>S</sup> ST <sup>P</sup> T <sup>K</sup> S <sup>G</sup> R <sup>K</sup> R <sup>K</sup> Y <sup>D</sup>               | 388 |
| LA1027 | 368 | KL <sup>H</sup> A <sup>Q</sup> PP <sup>V</sup> W <sup>Q</sup> N <sup>L</sup> A <sup>Y</sup> D <sup>P</sup> I <sup>S</sup> NT <sup>T</sup> W <sup>K</sup> R <sup>S</sup> D <sup>G</sup> Y <sup>T</sup> S <sup>E</sup> F <sup>S</sup> D <sup>R</sup> Y <sup>P</sup> Y <sup>G</sup> F <sup>I</sup> Y <sup>A</sup> D <sup>S</sup> ST <sup>P</sup> T <sup>K</sup> S <sup>G</sup> H <sup>K</sup> R <sup>K</sup> Y <sup>D</sup>                             | 427 |
| LA1029 | 399 | K <sup>S</sup> H <sup>A</sup> Q <sup>P</sup> P <sup>V</sup> W <sup>Q</sup> N <sup>L</sup> A <sup>Y</sup> D <sup>P</sup> I <sup>S</sup> K <sup>Q</sup> T <sup>W</sup> T <sup>V</sup> S-G <sup>Y</sup> T <sup>S</sup> D <sup>E</sup> F <sup>S</sup> D <sup>H</sup> Y <sup>P</sup> Y <sup>G</sup> F <sup>V</sup> Y <sup>A</sup> D <sup>P</sup> ST <sup>P</sup> T <sup>K</sup> S <sup>G</sup> H <sup>K</sup> K <sup>K</sup> Y <sup>D</sup>               | 457 |
| LA4004 | 328 | K <sup>S</sup> H <sup>A</sup> Q <sup>P</sup> P <sup>I</sup> W <sup>Q</sup> N <sup>L</sup> A <sup>Y</sup> D <sup>P</sup> I <sup>S</sup> PT <sup>T</sup> W <sup>K</sup> R <sup>K</sup> N <sup>G</sup> Y <sup>T</sup> S <sup>E</sup> F <sup>S</sup> D <sup>H</sup> F <sup>I</sup> Y <sup>G</sup> F <sup>V</sup> Y <sup>A</sup> D <sup>P</sup> ST <sup>P</sup> T <sup>K</sup> S <sup>G</sup> H <sup>K</sup> R <sup>K</sup> Y <sup>D</sup>                | 387 |
| LA3540 | 327 | G <sup>T</sup> H <sup>F</sup> G <sup>P</sup> Q <sup>V</sup> W <sup>Q</sup> N <sup>L</sup> A <sup>Y</sup> D <sup>P</sup> I <sup>T</sup> P <sup>T</sup> W <sup>N</sup> -V <sup>V</sup> G <sup>Y</sup> T <sup>G</sup> Y <sup>E</sup> F <sup>S</sup> D <sup>R</sup> Y <sup>P</sup> Y <sup>G</sup> F <sup>I</sup> Y <sup>A</sup> D <sup>S</sup> N <sup>I</sup> P <sup>T</sup> Q <sup>S</sup> A <sup>H</sup> R <sup>R</sup> K <sup>Y</sup> D               | 385 |
| LA3050 | 75  | -----T--TR <sup>K</sup> Y <sup>G</sup>                                                                                                                                                                                                                                                                                                                                                                                                               | 81  |
| P17627 | 389 | R <sup>V</sup> S <sup>F</sup> V <sup>S</sup> V <sup>A</sup> T <sup>G</sup> K <sup>K</sup> I <sup>Q</sup> AN <sup>S</sup> E <sup>K</sup> S <sup>N</sup> A <sup>W</sup> L <sup>K</sup> V <sup>N</sup> --ATT <sup>E</sup> T <sup>D</sup> L <sup>T</sup> K <sup>F</sup> N <sup>L</sup> V <sup>Q</sup> T <sup>N</sup> D <sup>P</sup> D <sup>S</sup> N <sup>P</sup> S <sup>C</sup> M <sup>K</sup> S <sup>G</sup> H <sup>V</sup>                            | 445 |
| LA1027 | 428 | Q <sup>V</sup> S <sup>F</sup> Q <sup>S</sup> T <sup>F</sup> N <sup>R</sup> K <sup>F</sup> I <sup>Q</sup> AD <sup>H</sup> N <sup>K</sup> D <sup>G</sup> W <sup>L</sup> K <sup>A</sup> D---TR <sup>I</sup> K <sup>T</sup> D <sup>F</sup> T <sup>K</sup> F <sup>N</sup> L <sup>L</sup> Q <sup>E</sup> N <sup>V</sup> S <sup>E</sup> N <sup>P</sup> S <sup>C</sup> M <sup>N</sup> S <sup>G</sup> S <sup>V</sup>                                          | 484 |
| LA1029 | 458 | Q <sup>V</sup> S <sup>F</sup> Q <sup>S</sup> AA <sup>N</sup> G <sup>K</sup> Y <sup>I</sup> Q <sup>A</sup> D <sup>P</sup> N <sup>R</sup> K <sup>N</sup> G <sup>W</sup> L <sup>K</sup> A <sup>D</sup> ---AV <sup>I</sup> E <sup>T</sup> D <sup>F</sup> T <sup>K</sup> F <sup>N</sup> L <sup>L</sup> Q <sup>E</sup> G <sup>N</sup> --L <sup>N</sup> D <sup>S</sup> C <sup>I</sup> K <sup>N</sup> G <sup>L</sup> V                                       | 512 |
| LA4004 | 388 | Q <sup>V</sup> S <sup>L</sup> I <sup>A</sup> K <sup>Y</sup> T <sup>G</sup> K <sup>A</sup> I <sup>Q</sup> V <sup>D</sup> H <sup>N</sup> R <sup>P</sup> D <sup>G</sup> W <sup>L</sup> K <sup>A</sup> D <sup>G</sup> T <sup>A</sup> K <sup>E</sup> K <sup>G</sup> T <sup>E</sup> F <sup>T</sup> K <sup>F</sup> N <sup>L</sup> L <sup>Q</sup> E <sup>Y</sup> D <sup>P</sup> D <sup>S</sup> T <sup>F</sup> C <sup>M</sup> L <sup>G</sup> G <sup>R</sup> V | 447 |
| LA3540 | 386 | Q <sup>V</sup> S <sup>F</sup> E <sup>S</sup> M <sup>S</sup> T <sup>G</sup> K <sup>K</sup> I <sup>Q</sup> AD <sup>P</sup> K <sup>Q</sup> A <sup>N</sup> G <sup>W</sup> L <sup>Q</sup> V <sup>N</sup> --AS <sup>D</sup> E <sup>T</sup> E <sup>F</sup> T <sup>K</sup> F <sup>N</sup> L <sup>L</sup> Q <sup>E</sup> AD <sup>P</sup> K <sup>S</sup> D <sup>T</sup> N <sup>C</sup> L <sup>K</sup> S <sup>G</sup> Y <sup>T</sup>                            | 442 |
| LA3050 | 82  | W <sup>V</sup> T <sup>F</sup> T <sup>S</sup> Q <sup>V</sup> T <sup>G</sup> K <sup>K</sup> I <sup>Q</sup> AD <sup>P</sup> ER <sup>P</sup> D <sup>G</sup> W <sup>L</sup> RV <sup>N</sup> --AS <sup>S</sup> N <sup>T</sup> D <sup>F</sup> T <sup>F</sup> T <sup>L</sup> Y <sup>Q</sup> D <sup>G</sup> K---D <sup>P</sup> D <sup>C</sup> I <sup>K</sup> G <sup>G</sup> P <sup>I</sup>                                                                    | 135 |
| P17627 | 446 | R <sup>I</sup> ESS <sup>H</sup> S <sup>L</sup> N <sup>Y</sup> F <sup>W</sup> N <sup>W</sup> W <sup>L</sup> G <sup>G</sup> G <sup>K</sup> G <sup>N</sup> Y <sup>A</sup> Y <sup>P</sup> K <sup>F</sup> N <sup>D</sup> G <sup>S</sup> N <sup>R</sup> I <sup>Q</sup> T <sup>I</sup> N <sup>L</sup> D <sup>G</sup> G-CL <sup>Q</sup> D <sup>G</sup> S <sup>R</sup> V <sup>A</sup> F <sup>K</sup> D <sup>Y</sup> D <sup>T</sup>                            | 504 |
| LA1027 | 485 | R <sup>I</sup> ESS <sup>Y</sup> Y <sup>L</sup> N <sup>Y</sup> Y <sup>W</sup> N <sup>W</sup> F <sup>I</sup> G <sup>A</sup> AS <sup>G</sup> D <sup>Y</sup> G <sup>Y</sup> T <sup>K</sup> F <sup>N</sup> NG <sup>S</sup> D <sup>S</sup> L <sup>G</sup> I <sup>K</sup> N <sup>L</sup> D <sup>N</sup> G-CL <sup>K</sup> D <sup>G</sup> S <sup>R</sup> V <sup>A</sup> F <sup>Y</sup> D <sup>W</sup> D <sup>T</sup>                                         | 543 |
| LA1029 | 513 | R <sup>I</sup> ESS <sup>R</sup> L <sup>N</sup> Y <sup>F</sup> W <sup>N</sup> W <sup>L</sup> G <sup>G</sup> S <sup>G</sup> N <sup>Y</sup> G <sup>Y</sup> S <sup>K</sup> F <sup>N</sup> DA <sup>S</sup> N <sup>Q</sup> L <sup>E</sup> I <sup>N</sup> LS <sup>D</sup> E-CL <sup>E</sup> NG <sup>S</sup> L <sup>V</sup> F <sup>K</sup> D <sup>Y</sup> D <sup>T</sup>                                                                                     | 571 |
| LA4004 | 448 | R <sup>I</sup> ESS <sup>Q</sup> Y <sup>L</sup> N <sup>Y</sup> F <sup>W</sup> T <sup>W</sup> W <sup>L</sup> R <sup>G</sup> G <sup>G</sup> G <sup>N</sup> Y <sup>A</sup> Y <sup>P</sup> K <sup>F</sup> D <sup>D</sup> SS <sup>K</sup> L <sup>L</sup> E <sup>M</sup> I <sup>I</sup> IR <sup>Q</sup> G-CL <sup>E</sup> D <sup>E</sup> S <sup>L</sup> V <sup>F</sup> K <sup>D</sup> F <sup>D</sup> T                                                      | 506 |
| LA3540 | 443 | R <sup>I</sup> E <sup>P</sup> S <sup>Y</sup> Y <sup>L</sup> N <sup>Y</sup> Y <sup>W</sup> N <sup>W</sup> W <sup>L</sup> G <sup>G</sup> G <sup>K</sup> G <sup>N</sup> Y <sup>A</sup> Y <sup>P</sup> K <sup>F</sup> N <sup>D</sup> AS <sup>N</sup> N <sup>L</sup> Q <sup>T</sup> H <sup>V</sup> L <sup>D</sup> E <sup>E</sup> E <sup>C</sup> I <sup>K</sup> D <sup>G</sup> S <sup>R</sup> I <sup>V</sup> F <sup>K</sup> D <sup>Y</sup> D <sup>G</sup>  | 502 |
| LA3050 | 136 | R <sup>V</sup> E <sup>P</sup> T <sup>A</sup> Y <sup>R</sup> N <sup>Y</sup> Y <sup>W</sup> N <sup>W</sup> W <sup>L</sup> G <sup>G</sup> A <sup>G</sup> N <sup>Y</sup> A <sup>Y</sup> P <sup>K</sup> Y <sup>K</sup> D <sup>G</sup> S <sup>N</sup> K <sup>L</sup> Q <sup>I</sup> Y <sup>V</sup> L <sup>K</sup> V <sup>S</sup> G <sup>C</sup> L <sup>E</sup> S <sup>G</sup> D <sup>R</sup> V <sup>L</sup> F <sup>S</sup> D <sup>Y</sup> D <sup>T</sup>   | 195 |
| P17627 | 505 | I <sup>S</sup> RR <sup>Q</sup> Y <sup>F</sup> L <sup>T</sup> V <sup>W</sup> E <sup>G</sup> G <sup>N</sup> W <sup>D</sup> K <sup>Y</sup> L <sup>Y</sup> L <sup>W</sup> RS-HI <sup>G</sup> L <sup>R</sup> E <sup>I</sup> F <sup>Y</sup> L <sup>K</sup> L <sup>D</sup> SS <sup>P</sup> E <sup>M</sup> N <sup>W</sup> S <sup>K</sup> L <sup>I</sup> Y <sup>R</sup> -                                                                                     | 556 |
| LA1027 | 544 | I <sup>G</sup> GG <sup>Y</sup> Y <sup>L</sup> T <sup>V</sup> W <sup>D</sup> K <sup>G</sup> S <sup>W</sup> K <sup>E</sup> H <sup>L</sup> FL <sup>W</sup> V <sup>Q</sup> S <sup>F</sup> L <sup>S</sup> S <sup>R</sup> E <sup>I</sup> F <sup>Y</sup> L <sup>H</sup> L <sup>D</sup> S <sup>N</sup> P <sup>P</sup> K <sup>D</sup> W <sup>S</sup> K <sup>D</sup> L <sup>I</sup> Y <sup>H</sup> H                                                           | 597 |
| LA1029 | 572 | Y <sup>S</sup> R <sup>N</sup> H <sup>Y</sup> Y <sup>L</sup> T <sup>V</sup> W <sup>D</sup> K <sup>G</sup> N <sup>W</sup> E <sup>H</sup> L <sup>Y</sup> L <sup>W</sup> K <sup>D</sup> -S <sup>I</sup> S <sup>Q</sup> R <sup>E</sup> I <sup>F</sup> Y <sup>L</sup> K <sup>L</sup> N <sup>S</sup> T <sup>P</sup> V <sup>R</sup> N <sup>W</sup> S <sup>A</sup> D <sup>L</sup> I <sup>Y</sup> R-                                                           | 623 |
| LA4004 | 507 | Y <sup>S</sup> R <sup>N</sup> H <sup>Y</sup> Y <sup>L</sup> AV <sup>W</sup> ENG <sup>S</sup> W <sup>K</sup> D <sup>Y</sup> I <sup>L</sup> Y <sup>W</sup> T-NA <sup>Q</sup> P <sup>N</sup> S <sup>Y</sup> F <sup>I</sup> A <sup>K</sup> L <sup>N</sup> T <sup>S</sup> P <sup>E</sup> R <sup>D</sup> W <sup>S</sup> K <sup>D</sup> L <sup>I</sup> Y <sup>R</sup> -                                                                                     | 558 |
| LA3540 | 503 | A <sup>T</sup> L <sup>D</sup> Y <sup>Y</sup> Y <sup>L</sup> T <sup>I</sup> W <sup>D</sup> G <sup>G</sup> N <sup>W</sup> D <sup>G</sup> Y <sup>L</sup> Y <sup>L</sup> W <sup>N</sup> K-TY <sup>N</sup> L <sup>R</sup> E <sup>T</sup> F <sup>K</sup> V <sup>R</sup> L <sup>N</sup> T <sup>K</sup> P <sup>E</sup> R <sup>D</sup> W <sup>K</sup> D <sup>L</sup> I <sup>Y</sup> R-                                                                        | 554 |
| LA3050 | 196 | I <sup>T</sup> Q <sup>D</sup> D <sup>Y</sup> F <sup>V</sup> I <sup>D</sup> W <sup>D</sup> G <sup>G</sup> S <sup>W</sup> N <sup>E</sup> Y <sup>L</sup> FL <sup>W</sup> Y <sup>K</sup> F <sup>P</sup> K <sup>V</sup> Q <sup>R</sup> G <sup>Y</sup> F <sup>Y</sup> V <sup>Q</sup> L <sup>N</sup> E <sup>G</sup> P <sup>E</sup> -----                                                                                                                    | 239 |

**B. Domain and amino acid sequence similarity analysis of predicted non-sphingomyelinase hemolysins**

Relevant genes: *tlyA*, LA0327; *hlyX*, LA0378; *hlpA*, LA1650; *hlyC*, LA3937

**1. LA0327 (*tlyA*)**

**Domain analysis**

PD007579

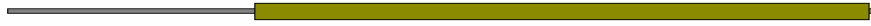

LA0327

PD007579: hemolysin A from *Treponema hyodysenteriae*

**Sequence similarity analysis: Identities:0.36; Similarities:0.51**

|              |     |                         |                    |                  |                 |                  |               |     |
|--------------|-----|-------------------------|--------------------|------------------|-----------------|------------------|---------------|-----|
| LA0327_LEPIN | 1   | LFPQKKNKHSFRSFRFTLAR--- | EMIRLDVLLFERGFADSL | EKAKSL           | ILSGSVLVNEQKV   | 57               |               |     |
| Q06803_TREHY | 1   | -----                   | MRLDEYVHSEGYTESRS  | SKAQDI           | LAGCVFVNGVKV    | 35               |               |     |
| Q9X1R2_THEMA | 1   | -----                   | MAD---             | KKRLDQLVLERGLV   | SREKAKVL        | LAGKVLVNGERV     | 39            |     |
| P19672_BACSU | 1   | -----                   | MTS---             | KKERLDVLLVERGLA  | ETREKAKRA       | IMAGIVYSNENRL    | 40            |     |
| Q9K972_BACHA | 1   | -----                   | MS---              | KKERVDVLLVERGLM  | ETREKAKRS       | IMAGLVFSGHERV    | 39            |     |
| Q8XJE2_CLOPE | 1   | -----                   | MAEKKEKERLDVLLV    | EOGIAESREKAKRY   | IMAGMVFIGEKRV   | 43               |               |     |
| Q92BY9_LISIN | 1   | -----                   | MTI---             | KKERADILLVEQGLF  | ETREKAKRA       | IMAGIVYRKEERV    | 40            |     |
| Q8Y7C0_LISMO | 1   | -----                   | MTI---             | KKERADILLVEQGLF  | ETREKAKRA       | IMAGIVYRKEERV    | 40            |     |
| Q9F6Y3_CHLAU | 1   | -----                   | MP---              | RORLDQVLLVSRGLA  | ETARRAQAL       | IMAGQVLVNGQVQ    | 38            |     |
|              |     |                         |                    |                  |                 |                  |               |     |
| LA0327_LEPIN | 58  | TKVGFKFPKDS             | SEIRILNI           | IPEYVSRGVYKLLKA  | FVFPLOVDGKLC    | LDLGASTGGFTQVL   | 117           |     |
| Q06803_TREHY | 36  | TSKAHKIKD               | TDNIEVQN           | IKYVSRAGEKLEKA   | FVEFGISVENKIC   | LDIGASTGGFTDCL   | 94            |     |
| Q9X1R2_THEMA | 40  | TKASKLVPE               | DANVELLEE          | PKYVSRGGYKLESA   | FESFKIDVSGK     | VACDIGASTGGFTDFL | 98            |     |
| P19672_BACSU | 41  | DKPGEKIDRD              | LPLTVKGNPLR        | YVSRGGKLEKALKE   | FPVSVKDKIM      | LDIGASTGGFTDCA   | 100           |     |
| Q9K972_BACHA | 40  | DKPGKLVDRD              | TPLSVKGEVLP        | YVSRGGKLEKALRA   | FDLHLDTRVVD     | LDIGASTGGFTDCA   | 99            |     |
| Q8XJE2_CLOPE | 44  | DKAGEKVPVSSNI           | IFRGEKLP           | YVSRGGFKLDKAVKS  | FGIDLKGGKRC     | LDIGASTGGFTDCM   | 103           |     |
| Q92BY9_LISIN | 41  | DKPGEKIPAD              | SELOVKGKOMP        | YVSRGGKLEKALQV   | FNFVDKDKLMD     | LDIGASTGGFTDCA   | 100           |     |
| Q8Y7C0_LISMO | 41  | DKPGEKIPAD              | SELOVKGKOMP        | YVSRGGKLEKALQV   | FNFVDKDKLMD     | LDIGASTGGFTDCA   | 100           |     |
| Q9F6Y3_CHLAU | 39  | TKAGTLIAD               | DASVEVRTG          | LPYVSRGGFKLAHA   | LDDQFALDPTGLTA  | LDVIGASTGGFTDVL  | 97            |     |
|              |     |                         |                    |                  |                 |                  |               |     |
| LA0327_LEPIN | 118 | LEKGAWKVEA              | CDVGYGQLAEKLRN     | HSSVIVKDRFHLKNLS | SALEIDWENNR     | FQTPHPEAIV       | 177           |     |
| Q06803_TREHY | 95  | LKHGAKKYAL              | LDVGHNLVYKLRND     | NRVVSIEDFN       | AKDINKEMFNDE    | -----            | IPSV          | 145 |
| Q9X1R2_THEMA | 99  | LQRGAKKYAV              | DDVGYGQLHKKLRND    | PRVVMEKVNARYLN   | PDDLGE          | -----            | KVDV          | 148 |
| P19672_BACSU | 101 | LQNGAKQSYA              | VDDVGYQLAWKLRD     | ERVVMERTNFRYA    | TPADFTKG        | -----            | MPEF          | 151 |
| Q9K972_BACHA | 100 | LQNGATFYA               | VDDVGYQLAWKLRD     | ERVVMERTNFRYLK   | PEVLERG         | -----            | LPNM          | 150 |
| Q8XJE2_CLOPE | 104 | LONDASKVFS              | IDVGYGQFAWKLRVD    | PRVVCERTNFRYV    | TPAQIGE         | -----            | LCDF          | 153 |
| Q92BY9_LISIN | 101 | LQNGARHSYAL             | DDVGYQLAWKLRND     | ERVVMERTNFRHV    | TPADFTG         | -----            | LAEF          | 151 |
| Q8Y7C0_LISMO | 101 | LQNGARHSYAL             | DDVGYQLAWKLRND     | ERVVMERTNFRHV    | TPADFAEG        | -----            | LADF          | 151 |
| Q9F6Y3_CHLAU | 98  | LQRGAGRVA               | VDDVGYGTLDRHLRND   | PRVVALERTNIRHL   | TALPANT         | -----            | LADC          | 147 |
|              |     |                         |                    |                  |                 |                  |               |     |
| LA0327_LEPIN | 178 | IVMDLSFISL              | RSVFPVIQKLRKEK     | IPKLECVSLIKPQFEA | NRNDLVKGI       | LKDKSKIRFQ       | 236           |     |
| Q06803_TREHY | 146 | IVSDVSFISL              | TKIAPIIFKELN       | -----            | NLEFVWTLIKPQFEA | ERGDVSKGGI       | IRDDILREK     | 201 |
| Q9X1R2_THEMA | 149 | VTCVDSFISL              | KKIIPAI            | SRILK-----       | NIGDALLVKPQFEA  | PRKFFL           | KKGIVKDPGVHLE | 203 |
| P19672_BACSU | 152 | ATIDVSFISL              | RLLPVLRTLLV        | -----            | PGSDCMALVKPQFEA | GRSVGKKGI        | IVRDPKVHAD    | 207 |
| Q9K972_BACHA | 151 | ATIDVSFISL              | KLLPVLKTMLL        | -----            | ENSDVVALVKPQFEA | GREVVGKGI        | IVRDKSVHQA    | 206 |
| Q8XJE2_CLOPE | 154 | ASIDVSFISL              | TTVLPVAVLNLLN      | -----            | DNGEVMALIKPQFEA | GREKVGKGI        | VVREASTHKE    | 209 |
| Q92BY9_LISIN | 152 | ATIDVSFISL              | KLLPVLRTVLLV       | -----            | TGGDVMTLIKPQFEA | GREVVGKGI        | IRDPAVHEA     | 207 |
| Q8Y7C0_LISMO | 152 | ATIDVSFISL              | KLLPVLRTVLLV       | -----            | TGGDVMTLIKPQFEA | GREVVGKGI        | IRDPAVHES     | 207 |
| Q9F6Y3_CHLAU | 148 | AVIDVSFISL              | RLLVPAVQRLVT       | -----            | PTAWIVALIKPQFEA | GPKHVGGV         | VVRDPAVHAQ    | 203 |
|              |     |                         |                    |                  |                 |                  |               |     |
| LA0327_LEPIN | 237 | IVLSLCRYL               | KKKEIGGFVLEWSP     | IEGRDGNKEILLFWNL | -----           | -----            | 276           |     |
| Q06803_TREHY | 202 | ILNNAISKI               | IDCGFKEVNRTISP     | IKGAKGNTEYLAHF   | II-----         | -----            | 240           |     |
| Q9X1R2_THEMA | 204 | VLEEIRKSL               | IENGFVVKGCCFSK     | IKGTEGNIEYFFWVK  | KEGENAEID---    | LRKIV            | VEEAW         | 259 |
| P19672_BACSU | 208 | VLKRMISFS               | AAEGYICKGLSFS      | ITGGDGNIEFL      | LQFALAGRGTGR    | -----            | PGTAGR-RD     | 261 |
| Q9K972_BACHA | 207 | VLSTIVEFA               | LKEGYAVGGLDFSP     | ITGGEGNIEFL      | LHLMMWRKDKESF   | IS--             | QEMIRDTVE     | 263 |
| Q8XJE2_CLOPE | 210 | VIKKIVDFA               | LSHKNILGLDFSP      | ITGGEGNIEFL      | IYLKKDNNTTEFDY  | -----            | NIIDVV        | 265 |
| Q92BY9_LISIN | 208 | VVENIALFA               | LDNGYDLMGLDFSP     | ITGGEGNIEFL      | IAHLKWTGKETGENH | LEPAA            | ITKLI         | 266 |
| Q8Y7C0_LISMO | 208 | VVEHIVQFA               | LDNGYDLMGLDYSP     | ITGGEGNIEFL      | IAHLKWTGEETG    | ISHLEPDA         | ITKLI         | 266 |
| Q9F6Y3_CHLAU | 204 | VTRDILSFA               | RDCGLNPAALTRSP     | ITGPAGNVEFL      | LALFHPARPTLDSE  | -----            | RAIAS-VV      | 257 |
|              |     |                         |                    |                  |                 |                  |               |     |
| LA0327_LEPIN | 276 | -----                   | 276                | -----            | -----           | -----            | -----         |     |
| Q06803_TREHY | 240 | -----                   | 240                | -----            | -----           | -----            | -----         |     |
| Q9X1R2_THEMA | 260 | RFFGERER                | -                  | 267              | -----           | -----            | -----         |     |
| P19672_BACSU | 262 | HARCRRST                | -                  | 269              | -----           | -----            | -----         |     |
| Q9K972_BACHA | 264 | RAHLELKKG               | -                  | 272              | -----           | -----            | -----         |     |
| Q8XJE2_CLOPE | 266 | KSHSDL                  | -                  | 271              | -----           | -----            | -----         |     |
| Q92BY9_LISIN | 267 | KAHTKLDK                | -                  | 274              | -----           | -----            | -----         |     |
| Q8Y7C0_LISMO | 267 | KAHTKLDK                | -                  | 274              | -----           | -----            | -----         |     |
| Q9F6Y3_CHLAU | 258 | HTH                     | -----              | 260              | -----           | -----            | -----         |     |

## 2. LA0378 (*hlyX*) Domain analysis

PD314750

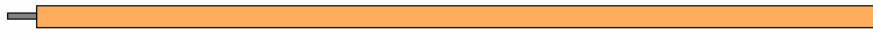

LA0378

PD314750: hemolysinX from *Leptospira borgpetersenii*

Sequence similarity analysis: Identities:0.90; Similarities:0.94

|              |     |                          |                                         |                                 |                  |     |
|--------------|-----|--------------------------|-----------------------------------------|---------------------------------|------------------|-----|
| LA0378_LEPIN | 1   | LVEALSVSDLRRKSMNRSII     | ITGFLFICAGLLTAVYQITIQDEDSKRKNVLEKIKEGEE | 60                              |                  |     |
| Q9RMG4_LEPBO | 1   | -----MNRSII              | ITGFLFICAGLLIGVYQTTVQDEDSKRTSVLERIKEGEE | 46                              |                  |     |
| LA0378_LEPIN | 61  | YLKQTN                   | SKAAEKAVDIFSELSAREIPEEH                 | SFRVKYDMGRALERNQDSSLALGIYRELNQK | 120              |     |
| Q9RMG4_LEPBO | 47  | YLKQIN                   | PSATEKAVDIFSELSAKEIPEEY                 | SFRVKYDMGRALERNQDSSLALGIYRELNQK | 106              |     |
| LA0378_LEPIN | 121 | EGLSRDERSKVAYS           | SMGNLLQLNRDEEGKGHLEEVLRISADSK           | LRSNALSAIADYYMKKG               | 180              |     |
| Q9RMG4_LEPBO | 107 | EGLSRDERSKVAYS           | SMGNLLQLNRDEEGKGHLEEVLRISADSK           | FRSNALSAIADYYMKKG               | 166              |     |
| LA0378_LEPIN | 181 | NYDLSRKNYVLALQEDPENVKARV | RWGKSLRRMGKDSAYD                        | VYDDYAQAGFYDPEKEKV              | 240              |     |
| Q9RMG4_LEPBO | 167 | NYDLSRKNYVLALQEDPENVKARV | RWGKSLRRMGKDSAYE                        | VYDDYAQAGFYDPEKEKV              | 226              |     |
| LA0378_LEPIN | 241 | SSEFRSGILEKARQLYVRKQYYGA | IDTFKKALDMGVSS                          | KAAEQALFYIAESYEAIGKSDS          | 300              |     |
| Q9RMG4_LEPBO | 227 | TSEFRSGILEKARQLYVRKQYYGA | IDTFKKALEMGI                            | SPKAAEQALFYIAESYEAIVGKSDS       | 286              |     |
| LA0378_LEPIN | 301 | ALQYLN                   | RVLGNQDGS                               | LDQTALFRKGTIYFKSGKYEKAAALFQEA   | TDKYPDSPVGRKASAW | 360 |
| Q9RMG4_LEPBO | 287 | ALQYLN                   | RVLGNQDGS                               | LDQTALFRKGTIYFKSGKYEKAAALFQEA   | SDRYPDSPVGRKASAW | 346 |
| LA0378_LEPIN | 361 | KKESLDQVEDNLHYKQEDKE     | KKSKEDLETEKLD                           | 392                             |                  |     |
| Q9RMG4_LEPBO | 347 | KKESLDQIEDNLHYKESDKA     | KKSKEDLETERLD                           | 378                             |                  |     |



#### 4. LA3937 (hlyC)

##### Domain analysis

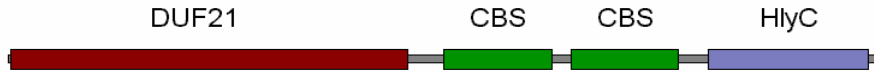

LA3937

DUF21: Domain of unknown function

CBS (cystathionine-beta-synthase): unknown function

HlyC: involved in Magnesium and cobalt efflux

##### Sequence similarity analysis Identities:0.34; Similarities:0.56

|              |     |                                         |                                             |     |
|--------------|-----|-----------------------------------------|---------------------------------------------|-----|
| LA3937_LEPIN | 1   | -----ME-----LIGFFIVLILFANGFFVSAEFALVSRP | SRLEELIKE                                   | 40  |
| Q9PIU6_CAMJE | 1   | MDPSQVLDLNQSTASFDAGYSILMVVVALVFLNGFFVLS | EFVVKVRRSKLEEMVKE                           | 60  |
| Q9ZJC9_HELPY | 1   | -----MDPSESILMLMVAFLLVFLNAFFVLS         | EFALVKVRKTRLEELVKI                          | 44  |
| Q97J64_CLOAC | 1   | -----MDN-----LLNIVIIILLVFMNAFFVAAEF     | SMVKIRKSRILETLVLD                           | 41  |
| O26023_CAMPY | 1   | -----MGRNQGAYLDPSESILMLMVAFLLVFLNAFFVLS | EFALVKVRKTRLEELVKI                          | 52  |
| O07585_BACSU | 1   | -----MD-----LVNLIIVAVLIALTAFFVAS        | EFVIRIRGSRIDQLIAE                           | 40  |
| P54428_BACSU | 1   | -----MT-----TINLIIFTLLIVLTAFFVAT        | EFVIRKRSKIDQLILE                            | 40  |
| LA3937_LEPIN | 41  | NKPLAFITKRAAQKNDMLSVCCQVGTITIASLLGWGGE  | GYVSRWLFLEMFYGYSANEAT                       | 100 |
| Q9PIU6_CAMJE | 61  | KKAGAKKALEVTSRLODTYLSACQLGITLSSLAGWIGEP | AIKMLLEIPLINLGFSS--TVI                      | 118 |
| Q9ZJC9_HELPY | 45  | GNSNAKLALEMSQRDITYLSATQLGITLSSLAGWGE    | PAIAKLLAALFESMDLRENPIF                      | 104 |
| Q97J64_CLOAC | 42  | GDKNAKYLGVINNSYLSACQLGITLSSLAGWGE       | PAVSKMLSPFLNLLKIP--KQI                      | 99  |
| O26023_CAMPY | 53  | GNSNAKLALKMSQRDITYLSATQLGITLSSLAGWGE    | PAIAKLLAALFESMDLRENPIF                      | 112 |
| O07585_BACSU | 41  | GNKAAIAVKKVTHLDEYLSACQLGITLSSLAGVLGEST  | IERLLHPLFVQMNVP--GSL                        | 98  |
| P54428_BACSU | 41  | GKKGAISAKKVIITHLDEYLSACQLGITVTA         | LGIWVGESTFEVILHPLFAHFHVS--ETV               | 98  |
| LA3937_LEPIN | 101 | VHGLAITTSFTITFLHLLGELLPKTVANTETIALFIS   | PLFFFYLYFPIITFFLNE                          | 160 |
| Q9PIU6_CAMJE | 119 | IHTMAFIIFASIIITLHVVLGELVPKSI            | IAVADKAVLFARPLHWVMMFLPCIKIFDF               | 178 |
| Q9ZJC9_HELPY | 105 | IHSMSVVIAFLSITFLHVVLGELVPKSLA           | AKSEKATLFAARPLHVFWVVFYPVVRFLDV              | 164 |
| Q97J64_CLOAC | 100 | IGSISVVVGFIIITGRHIVLGEAPK               | SVAI LNTE SIAKATAIPLTLFYKFTYPIVAFNK         | 159 |
| O26023_CAMPY | 113 | IHSMSVVIAFLSITFLHVVLGELVPKSLA           | AKSEKATLFAARPLHVFWVVFYPVVRFLDV              | 172 |
| O07585_BACSU | 99  | SHVISFIEAYAITFLHVVLGELAPKTV             | AIKQAEAVSMLFAKPLIWFYRIAFPFIWLLNN            | 158 |
| P54428_BACSU | 99  | SHVLIIVLAFVMAITLHVVLGELAPKTL            | AIKQAEITITLTAKPIIWFYRIELFPFIWFLNG           | 158 |
| LA3937_LEPIN | 161 | MTSFLKLIIGIEA-NKSRMMHSPFELMIIIE         | EQNKQKIDQEEFQIQNTFQFSEHQAKD                 | 219 |
| Q9PIU6_CAMJE | 179 | LAAISLKLFGIKPAKESLTHSEEEKI              | IASESQKGGVLEDEFETEIIRNAVDFSOTVAKE           | 238 |
| Q9ZJC9_HELPY | 165 | IAHFFLKKMGVNP-KHEEGMHSEELKI             | IVGESLREGIIDSVEGEIKNNAVDFSOTSAKE            | 223 |
| Q97J64_CLOAC | 160 | STDLVKLFGIKQVDHEEAHTDEEIRMLV            | ESYKHGLIDKTELTFVDNVDFSEKTVKE                | 219 |
| O26023_CAMPY | 173 | IAHFFLKKMGINP-KHDGTHSEELKI              | IVGESLREGIIDSVEGEIKNNAVDFSOTSAKE            | 231 |
| O07585_BACSU | 159 | SARLLTKAFGLTETSENGLAHSEELRI             | ILSESYKSGEINQSEFKYVNNIFEFDDRLAKE            | 218 |
| P54428_BACSU | 159 | SARFIVGLFGLKPASHEGLAHSEELRI             | ILSESYKSGEINQNELKYVNNIFEFDERIAKE            | 218 |
| LA3937_LEPIN | 220 | VMTHRLSIIIGIPHDTSMDSLISII               | IAEHHSRYPIYEGSIDKIGIITHVQTYLTWLSNS--        | 277 |
| Q9PIU6_CAMJE | 239 | IMTPRKDMICLNKQKSYEENMQI                 | ICEHKHTREPYIDGSKDITLGMHHRDIIQN-ELN-         | 295 |
| Q9ZJC9_HELPY | 224 | IMTPRKDMVCLDEENSYEENID                  | VLKSHFTRYPYCKGSKDNIGMVHHRDILLSRSIFT-        | 281 |
| Q97J64_CLOAC | 220 | IMVPRDMKCFVDESFDDIVGVT                  | IDIEHFTRYPVCEESKDNIGLITHKDLYKLNK--          | 277 |
| O26023_CAMPY | 232 | IMTPRKDMVCLDEENSYEENID                  | VLKGFHTRYPYCKGSKDNIGMVHHRDILLSRSIFT-        | 289 |
| O07585_BACSU | 219 | IMIPRTEIVSLPHDIKISEMMD                  | IIGIEKYTRYPVEEGDKDNIGVNIKEVLTACISG--        | 276 |
| P54428_BACSU | 219 | IMIPRREIVAISSEDSYETIVK                  | IKTESYTRYPVLNGDKDSIGFINAKEFLSAYIDTDQ        | 278 |
| LA3937_LEPIN | 278 | KKGRKEKVTAIMQPPIFVPEGLS                 | EKVMQKLRNKKQHMALVIDEYGGVAGLLTLEDIIEE        | 337 |
| Q9PIU6_CAMJE | 295 | --HKSQLDITFVKPLILVPENIS                 | SKVLVMNKNERSHTALVVDEYGGTAGLITMEDIMEE        | 353 |
| Q9ZJC9_HELPY | 281 | --PKMHDFKQIVRKMIVPESAS                  | ISQILIKMKKEQIHTALVIDEYGGTAGLLTMEIIEE        | 339 |
| Q97J64_CLOAC | 277 | ---EDEKIESIIREIKFVPESMS                 | SELFERMEQKERMQMALVIDEYGGTAGLVTIEDILEE       | 334 |
| O26023_CAMPY | 289 | --PKMHDFNQIVRKMIVPESAS                  | ISQILIKMKKEQIHTALVIDEYGGTAGLLTMEIIEE        | 347 |
| O07585_BACSU | 277 | EVSVDSTISQFVNPILHVI                     | ESAPQDLVKKMOKERVHMAILSDEYGGTAGLVTVEDIIEE    | 336 |
| P54428_BACSU | 279 | KIKEDFKLENHINPVHVI                      | ESVPHDVLVKKMOKERTHIALVIDEYGGTAGLVTAEIIEE    | 338 |
| LA3937_LEPIN | 338 | IFGQIRDETDHETDPFPTQHSDSFT               | IDGEAELDDLKEILVGVQEEIKDIRTTAGFILG           | 397 |
| Q9PIU6_CAMJE | 354 | IIGEIKSEHE--EDSYKKLAENI                 | YEFQGRCDIETVEEMLVINYDEDL-EQVTIGGYVFN        | 409 |
| Q9ZJC9_HELPY | 340 | IMGEISDEYDL-KQEGVKLEEGVFE               | LEGMLDLESVEEVLIHQFDKCE-EQVTLGGYVFS          | 397 |
| Q97J64_CLOAC | 335 | IVGEIQDEFD-EEMEEIKKTENG                 | SYVVDGKVLIEDINELDIEIYEE--NIDTIGGWIYS        | 391 |
| O26023_CAMPY | 348 | IMGEISDEYDL-KQEGINKLEEGVFE              | LEGMLDLESVEEAHQHIEFDKCE-EQVTLGGYVFS         | 405 |
| O07585_BACSU | 337 | IVGEIRDEFDIDKIEISEIRK                   | IGEGHYILDGKVLIDQVNDLGIHLENE--EVDTIGGWFLT    | 394 |
| P54428_BACSU | 339 | IVGEIRDEFDKDEVPNIRK                     | IGENHYILDSKVLIEDVNDLGLTTLASD--EVDTIGGWFLT   | 396 |
| LA3937_LEPIN | 398 | RIEDMPPEEGSTISLQGTTLT                   | VEKMEGNKILSVRFTRVSLNNRAQSKK----             | 444 |
| Q9PIU6_CAMJE | 410 | LLGRLPMVGDRIEDELICY                     | EVKMKDGNSEIRVKVVKTKNKDEE-----               | 452 |
| Q9ZJC9_HELPY | 398 | LLKERP                                  | IEGDTIVSHGYAFEVLSVDGARIKRLKAVKQDQGENEA----- | 441 |
| Q97J64_CLOAC | 392 | KLKKYPKTNEKINYGNYQ                      | FIIILKCDRRRIEKILIKNL-----                   | 428 |
| O26023_CAMPY | 406 | LLKERP                                  | MEGDTIVSHGYAFEVLSVDGARIKRLKAVKQDQGENEA----- | 449 |
| O07585_BACSU | 395 | KQYDVEKDSDILEEG-CE                      | FINEIDGHHVAYIEVKKLQEEELLETANQEA             | 444 |
| P54428_BACSU | 397 | QQIDAAVGSVIEADG-YI                      | FKVHETVGRHINYLEIVRKK-----                   | 434 |

Abbreviation used for sequences from relevant microorganisms:

*Treponema hyodysenteriae*, TREHY;

*Thermotoga maritime*, THEMA;

*Bacillus subtilis*, BACSU;

*Bacillus halodurans*, BACHA;

*Clostridium perfringens*, CLOPE;

*Listeria innocua*, LISIN;

*Listeria monocytogenes*, LISMO;

*Chloroflexus aurantiacus*, CHLAU;

*Campylobacter jejuni*, CAMJE;

*Helicobacter pylori* J99, HELPY;

*Clostridium acetobutylicum*, CLOAC;

*Leptospira interrogans*, LEPIN;

*Leptospira borgpetersenii*, LEPBO;

*Anabaena* sp. (strain PCC 7120), ANABA;

*Mycobacterium avium*, MYCAV.

\* Lee, S. H., Kim, S., Park, S. C. & Kim, M. J. Cytotoxic activities of *Leptospira interrogans* hemolysin SphH as a pore-forming protein on mammalian cells. *Infect Immun* **70**, 315-22 (2002).
